# Supplementary material for: Combining Nanopore and Illumina Sequencing Permits Detailed Analysis of Insertion Mutations and Structural Variations Produced by PEG-Mediated Transformation in Ostreococcus tauri
Source: MDPI journal article supplement (doi:10.3390/cells10030664), 2021-03-17
Supplement: s1 [file s1]

|                         |              | Viral strain |         |          |       |            |          |            |            |         |         |         |         |            |            |            |           |            |            |            |            |   |
|-------------------------|--------------|--------------|---------|----------|-------|------------|----------|------------|------------|---------|---------|---------|---------|------------|------------|------------|-----------|------------|------------|------------|------------|---|
| Lysis plaque Assay test | Virus Clones | Sylt2-1      | Sylt2-5 | OtV06-1* | OtV5* | OtV09-573* | OtV06-4* | OtV09-557* | OtV09-559* | OtV19-P | OtV19-O | OtV19-T | OtV19-R | OtV09-556* | OtV09-584* | OtV09-570* | OtV06-12* | OtV09-582* | OtV09-585* | OtV09-565* | OtV09-578* |   |
|                         |              |              |         |          |       |            |          |            |            |         |         |         |         |            |            |            |           |            |            |            |            |   |
| Host strain             | Test 1       | NT1          | -       | -        | -     | -          | -        | -          | -          | -       | -       | -       | -       | +/-        | +/-        | +/-        | +         | +          | +          | +          | +          |   |
|                         | Test 2       | NT1          | -       | -        | -     | -          | -        | -          | -          | +/-     | -       | +/-     | -       | -          | -          | -          | +         | -          | +          | +          | +          |   |
|                         | Test 1       | NT10         | -       | -        | -     | -          | -        | -          | -          | -       | -       | -       | -       | -          | +/-        | -          | +/-       | +          | +          | +          | +          |   |
|                         | Test 2       | NT10         | -       | -        | -     | -          | -        | -          | -          | -       | -       | -       | -       | -          | -          | -          | -         | +          | +          | +          | +          |   |
|                         | Test 1       | T3           | -       | -        | -     | -          | -        | -          | -          | -       | -       | -       | -       | -          | +/-        | -          | +         | +          | +          | +/-        | +/-        |   |
|                         | Test 2       | T3           | -       | -        | -     | -          | -        | -          | -          | -       | +/-     | -       | +/-     | -          | -          | -          | +/-       | +          | +          | +          | +/-        |   |
|                         | Test 1       | T6           | -       | -        | -     | -          | -        | -          | -          | -       | -       | -       | +/-     | -          | +/-        | +/-        | +         | +          | +          | +          | +          |   |
|                         | Test 2       | T6           | -       | -        | -     | -          | -        | -          | -          | -       | +/-     | -       | +/-     | -          | -          | -          | +/-       | +          | +          | +          | +/-        |   |
|                         | Test 1       | T12          | -       | +        | -     | -          | -        | -          | -          | -       | -       | -       | -       | +/-        | -          | -          | +         | +          | -          | -          | +          | + |
|                         | Test 2       | T12          | -       | -        | -     | -          | -        | -          | -          | -       | +       | -       | +       | -          | -          | -          | +/-       | +          | -          | -          | +          | + |
|                         | Test 1       | T14          | -       | +        | -     | -          | -        | -          | -          | -       | -       | -       | +       | -          | -          | -          | +         | +          | -          | -          | +          | + |
|                         | Test 2       | T14          | -       | -        | -     | -          | -        | -          | -          | -       | +       | -       | +       | -          | -          | -          | -         | +          | -          | -          | +          | + |
|                         | Test 1       | T16          | -       | +        | -     | -          | -        | -          | -          | -       | -       | -       | -       | +          | -          | -          | +         | +          | -          | -          | +          | + |
|                         | Test 2       | T16          | -       | -        | -     | -          | -        | -          | -          | -       | +       | -       | +       | -          | -          | -          | -         | +          | -          | -          | +          | + |

Figure S3. Spectrum of viral infectivity of untransformed (NTx) and transformed (Tx) clonal lines to twenty prasinoviruses (\*viruses from Clerissi et al, 2012). Two plaque assay tests were carried out three months apart (Test 1 and Test 2). Dark yellow background: large difference in viral lysis phenotype in test 2 compared to test 1 result. Light yellow background: moderate difference in viral lysis phenotype in test 2 compared to test 1 result. -: no lysis; +: high lysis; +/-: low lysis.
