# Supplementary material for: Combining Nanopore and Illumina Sequencing Permits Detailed Analysis of Insertion Mutations and Structural Variations Produced by PEG-Mediated Transformation in Ostreococcus tauri
Source: MDPI journal article supplement (doi:10.3390/cells10030664), 2021-03-17
Supplement: s1 [file s1]

| Clones | Total lengths of the mapped reads to vector (bp) | Average coverage (X) | Read pairs mapped to vector | Proper pairs mapped | Junction pairs mapped | Average insert size to vector |
|--------|--------------------------------------------------|----------------------|-----------------------------|---------------------|-----------------------|-------------------------------|
| T3     | 3,973,340                                        | 649                  | 39,220                      | 35,808              | 1,369                 | 284                           |
| T6     | 1,876,782                                        | 306                  | 18,502                      | 16,108              | 891                   | 302                           |
| T12    | 11,927,090                                       | 1947                 | 117,73                      | 110,66              | 2,294                 | 254                           |
| T14    | 1,276,034                                        | 208                  | 12,604                      | 11,418              | 363                   | 335                           |
| T16    | 3,252,705                                        | 531                  | 32,087                      | 29,814              | 1,083                 | 277                           |
| T3     | 3,973,340                                        | 649                  | 39,220                      | 35,808              | 1,369                 | 284                           |

**Table S2.** Summary Illumina reads mapping against pOLK4 vector sequence. Total reads length represents the number of processed bases from reads of total length complete vector sequence (6,014 bp).
