# Supplementary material for: Combining Nanopore and Illumina Sequencing Permits Detailed Analysis of Insertion Mutations and Structural Variations Produced by PEG-Mediated Transformation in Ostreococcus tauri
Source: MDPI journal article supplement (doi:10.3390/cells10030664), 2021-03-17
Supplement: s1 [file s1]

| Flanking junction | Target        | Product size (bp) | Sequence                          | Chromosome    | Location        | Accession number |
|-------------------|---------------|-------------------|-----------------------------------|---------------|-----------------|------------------|
| T3-5' end         | MetAP2        | 221               | T3F1: 5'-ACGGCAAGGAGTACCAAGTG-3'  | Chromosome 1  | 429,218-429,237 | KZ155838.1       |
|                   | pOLK4         |                   | T3R1: 5'-GCTATGTGGCGCGGTATTAT-3'  | Vector        | 5,926-5,945     | /                |
| T3-3' end         | pOLK4         | 320               | T3F2: 5'-ACGCTCAGTGGAACGAAAAC-3'  | Vector        | 674-693         | /                |
|                   | MetAP2        |                   | T3R2: 5'-ACCCACTCGGAGATGTATCG-3'  | Chromosome 1  | 434,878-434,897 | KZ155838.1       |
| T6-5' end         | Gene unknown  | 186               | T6F1: 5'-CTTTCGCCTTGCTTAGATCG-3'  | Chromosome 9  | 188,626-188,607 | KZ155772.1       |
|                   | pOLK4         |                   | T6R1: 5'-GCGGCCAACTTACTTCTGAC-3'  | Vector        | 87-106          | /                |
| T6-3' end         | pOLK4         | 415               | T6F2: 5'-CGCATATGGTGCACTCTCAG-3'  | Vector        | 5,318-5,337     | /                |
|                   | Gene unknown  |                   | T6R2: 5'-GAAGCGCTAAACGAGGAATG-3'  | Chromosome 9  | 184,410-184,391 | KZ155772.1       |
| T16-5' end        | Ribosomal L19 | 814               | T16F1: 5'-GTATTGCGATCGACGTGAAA-3' | Chromosome 20 | 131,491-131,510 | KZ155795.1       |
|                   | pOLK4         |                   | T3F2: 5'-ACGCTCAGTGGAACGAAAAC-3'  | Vector        | 674-693         | /                |
| T16-3' end        | pOLK4         | 239               | T3R1: 5'-GCTATGTGGCGCGGTATTAT-3'  | Vector        | 5,926-5,945     | /                |
|                   | Ribosomal L19 |                   | T16R2: 5'-ATGATCCTTCGTCCGTCGTC-3' | Chromosome 20 | 137,759-137,778 | KZ155795.1       |

Figure S7. Primers used in this study to confirm the flanking junctions in T3, T6 and T16 lines.
