# Supplementary material for: Combining Nanopore and Illumina Sequencing Permits Detailed Analysis of Insertion Mutations and Structural Variations Produced by PEG-Mediated Transformation in Ostreococcus tauri
Source: MDPI journal article supplement (doi:10.3390/cells10030664), 2021-03-17
Supplement: s1 [file s1]

A)

T3\_5'-end of flanking junction:

5'-  
TGAAGTGCTGCAGCAACTTGAACGGGCACTCCATTGATCCGTATAGGATTCACGTAATGAAT  
CGGCCAACGCGCGGGGAGAGGCGGTTTTCGTATTGGGCGCTCTTCCGCTTCCTCTCAACC  
AAGTCATTCTGAGAATAG-3'

T3\_3'-end of flanking junction:

5'-  
CGCTCAGTGGAACGAAACTCACGTTAAGGGATTTTGGTCATGAGATTATCAAAAAGGATCT  
TCACCTAGATCCTTTTTTTATACTCTGGACGGAAAACGCCCATCGACGTCACACACGCACCG  
ACCATCATACTCTGGACGGAAAACGCCCATCGACGAAACAACGAGGCGAGAC-3'

B)

T6\_5'-end of flanking junction: 5'-

TCGCTCTCGAACTCGCGTCGCATCGACCAATGACCAATATTCCGATTGGTATGGCTTCATTC  
AGCTCCGGTTCC-3'

T6\_3'-end of flanking junction:

5'-  
GCTGCATGTGTCAGAGGTTTTACCGTCATCACCGAAACGCGCGAGACGAAAGGGCCTCGT  
GATACGCCTATTTTTATAGGTTAATGTCATGATAATAATGGTTTCTTAGACGTCAGGTGGCAC  
TTTTCGGGGAAATGTGCGCGGAACCCCTATTTGTTTATTGCGTCGATGCGACGCGAGTTATG  
GGACCATTAAACGACCTCGGTGCGTTCTTGATGTTCTGTTTCTCCGCCTGTACCCGC-3'

C)

T16\_5'-end of flanking junction:

5'-  
TGACCCGAGGACGCGTTCGTGGGCGACGCCGGGAGGTCTTCCTGCGCCAAGGCCGGCAG  
ATCCCTGGGATCTGCGTCTCCAAAAGCGCTGGACCCTCACCAGTCACAGAAAAGCATCTTAC  
GGATGGCATGACAGTAAGAGAATTATGCAGTGCTGCCATAACCATGAGTGATAACACTGCG  
GCCAACTTACTTCTGACAACGATCGGAGGACCGAAGGAGCTAACCGCTTTTTTGCACAACAT  
GGGGGATCATGTAACCTCGCCTTGATCGTTGGGAACCGGAGCTGAATGAAGCCATACCAAAC  
GACGAGCGTGACACCACGATGCCTGTAGCAATGGCAACAACGTTGCGCAAATATTAACCTG  
GCGAACTACTTACTCTAGCTTCCCGGCAACAATTAAGACTGGATGGAGGCGGATAAAGTT  
GCAGGACCACTTCTGCGCTCGGCCCTTCCGGCTGGCTGGTTTATTGCTGATAAATCTGGAG  
CCGGTGAGCGTGCGTCTCGCGGTATCATTGCAGCACTGGGGCCAGATGGTAAGCCCTCC  
GTATCGTAG-3'

T16\_3'-end of flanking junction:

5'-  
TATTATCCCGTATTGACGCCGGGCAAGAGCAACTCGGTGCGCGCATACACTATTCTCAGAAT  
GACTTGTTGAGTGGCGCGGACGGACGACCCCCCATCTCGCGCCGCGCCACGCGT-3'

Figure S6. PCR-product sequences corresponding to both flanking regions (5'-end and 3'-end) of the pOLK4 vector (dark blue) integration site in the (A) T3, (B) T6 and (C) T16 clonal lines. The insertions of foreign DNA of non-vector origin are shown in red. The light blue represents the duplicated region of the vector.
