# Supplementary material for: Combining Nanopore and Illumina Sequencing Permits Detailed Analysis of Insertion Mutations and Structural Variations Produced by PEG-Mediated Transformation in Ostreococcus tauri
Source: MDPI journal article supplement (doi:10.3390/cells10030664), 2021-03-17
Supplement: s1 [file s1]

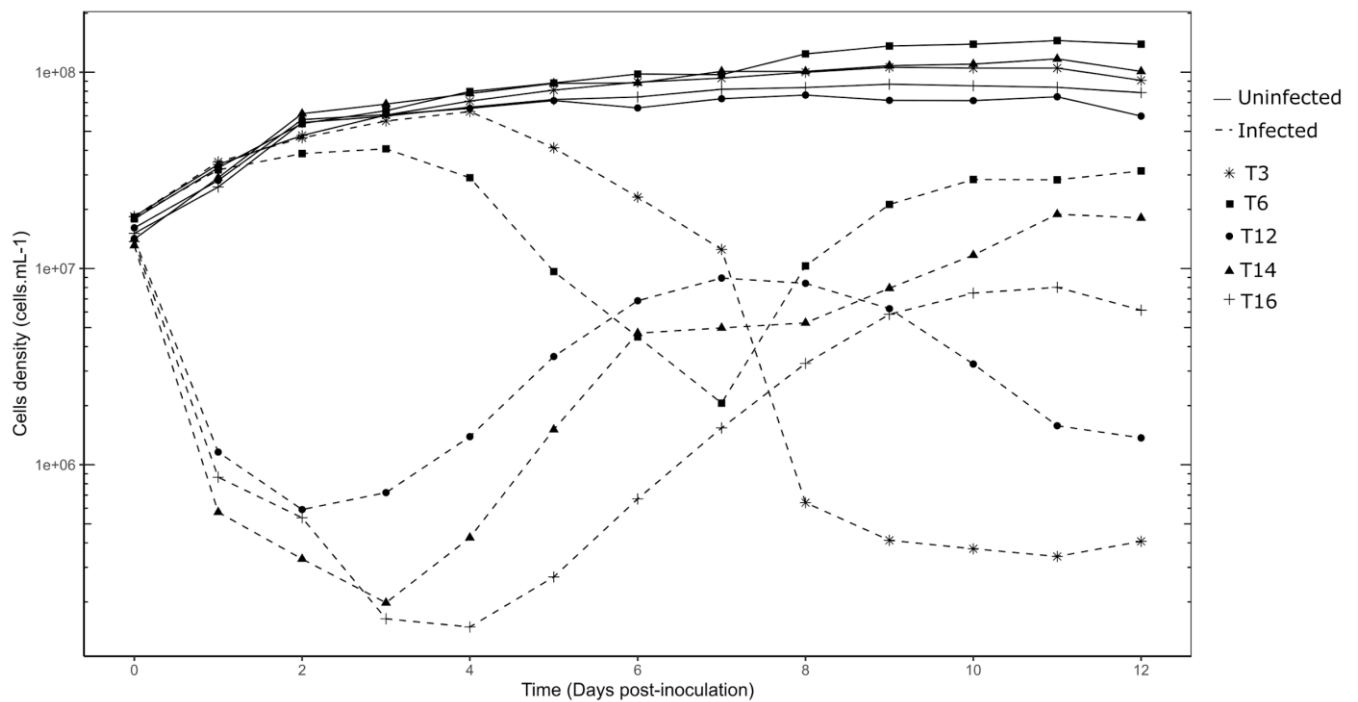

Figure S4. Cell dynamics of transformed clonal lines during 12 days post-inoculation (DPI). Solid lines represent the mock-inoculated control cultures and dashed lines are cultures infected with the OtV09-578 virus (isolated in Clerissi et al, 2012) at multiplicity of infection: MOI 5. Each point represents one replicate of each culture. The peak in cell lysis occurs at 3 DPI in the T12, T14 and T16 transformed lines in contrast to the T3 and T6 lines where the peak in lysis is observed after 7 DPI. Note that regrowth of OtV09-578-resistant cells was observed by flow cytometry.
